# Supplementary material for: Multi-hydroxyl-containing porous organic polymers based on phenol formaldehyde resin chemistry with high carbon dioxide capture capacity
Source: Royal Society of Chemistry journal article supplement (doi:10.1039/c5ra13405f), 2015-01-01
Supplement: c5ra13405f1.pdf [file c5ra13405f1.pdf]

Electronic Supplementary Information (ESI) for

**Multi-hydroxyl-containing porous organic  
polymers based on phenol formaldehyde resin  
chemistry with high carbon dioxide capture  
capacity**

Shi-Hui Jia,<sup>a</sup> Xuesong Ding,<sup>\*,b</sup> Hai-Tao Yu,<sup>\*,a</sup> and Bao-Hang Han<sup>\*,b</sup>

*<sup>a</sup> School of Chemistry and Materials Science, Hebei Normal University,  
Shijiazhuang 050024, China*

*<sup>b</sup> National Center for Nanoscience and Technology, Beijing 100190,  
China*

Tel.: +86 10 8254 5576. Email: [hanbh@nanoctr.cn](mailto:hanbh@nanoctr.cn)

Tel.: +86 10 8254 5708. Email: [dingxs@nanoctr.cn](mailto:dingxs@nanoctr.cn)

Tel.: +86 311 8078 7402. Email: [haitaoyu@mail.hebtu.edu.cn](mailto:haitaoyu@mail.hebtu.edu.cn)

## A. Elemental analysis data

**Table S1** Elemental analysis data of **PFPOP-1–3**.

| <b>PFPOPs</b>                                       |          | <b>C</b> | <b>N</b> | <b>H</b> |
|-----------------------------------------------------|----------|----------|----------|----------|
| <b>PFPOP-1</b>                                      | Exp. (%) | 68.13    | 0        | 3.62     |
| (C <sub>45</sub> H <sub>30</sub> O <sub>12</sub> )  | Cal. (%) | 70.86    | 0        | 3.96     |
| <b>PFPOP-2</b>                                      | Exp. (%) | 72.53    | 0        | 4.04     |
| (C <sub>63</sub> H <sub>42</sub> O <sub>12</sub> )  | Cal. (%) | 76.36    | 0        | 4.27     |
| <b>PFPO-3</b>                                       | Exp. (%) | 68.09    | 1.24     | 4.25     |
| (C <sub>57</sub> H <sub>39</sub> O <sub>12</sub> N) | Cal. (%) | 73.62    | 1.51     | 4.23     |

## B. Solid-state $^{13}\text{C}$ NMR spectra

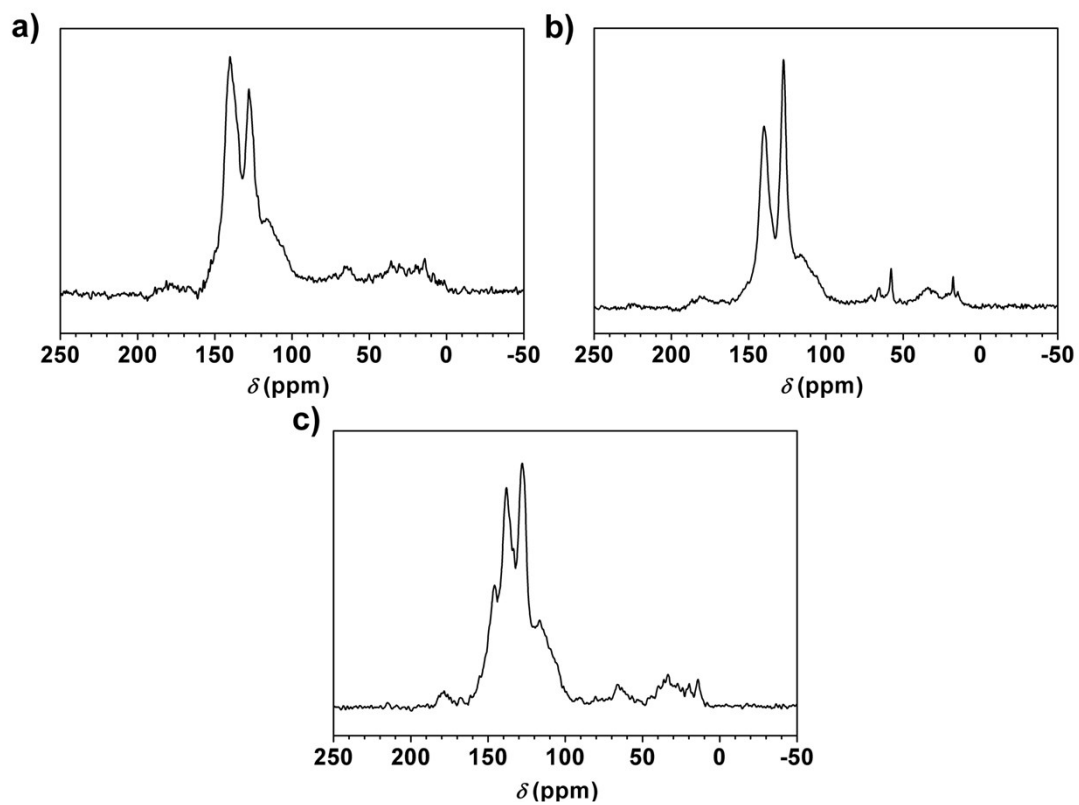

**Fig. S1** Solid-state  $^{13}\text{C}$  NMR spectra of (a) **PFPOP-1**, (b) **PFPOP-2** and (c) **PFPOP-**

**3.**

### C. TEM images

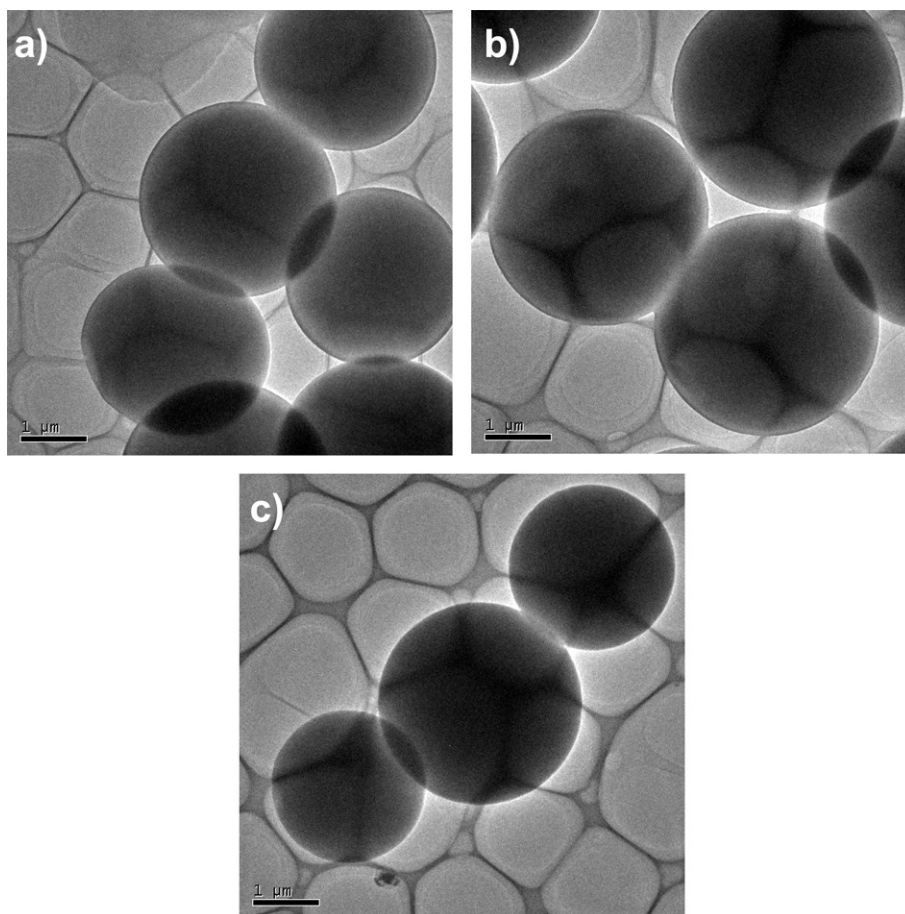

**Fig. S2** TEM images of (a) **PFPOP-1**, (b) **PFPOP-2**, and (c) **PFPOP-3**.

#### D. Corresponding data of porosity properties

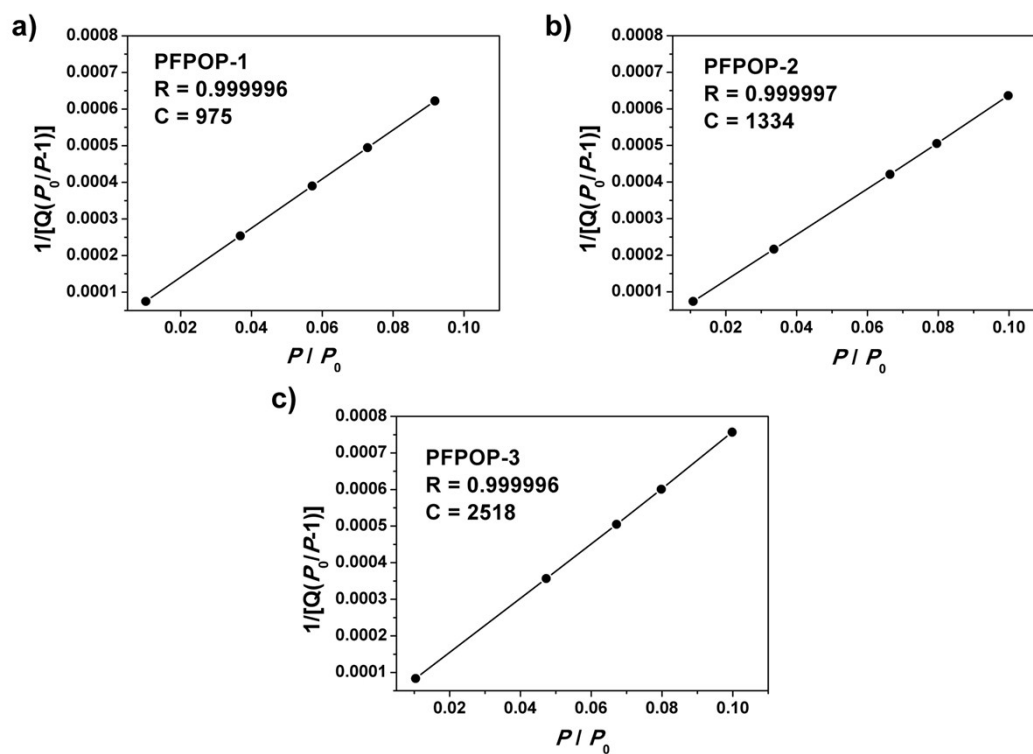

**Fig. S3** BET plots of PFPOP-1 (a), PFPOP-2 (b), and PFPOP-3 (c) from nitrogen adsorption data.

### E. Corresponding data of gas adsorption and selectivities

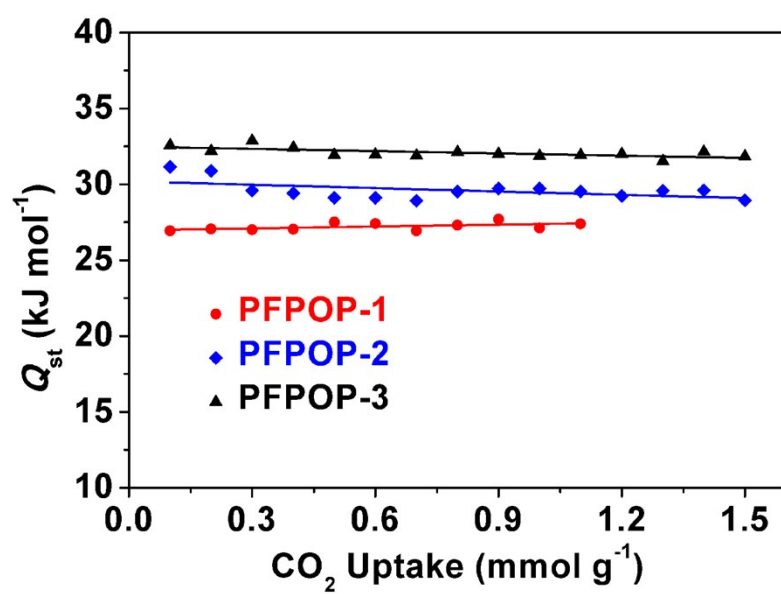

**Fig. S4** The isosteric heats of adsorption of CO<sub>2</sub> for PFPOP-1–3.

### **Ideal adsorbed solution theory (IAST) selectivity studies**

In order to evaluate the efficiency of PFPOPs for CO<sub>2</sub> over N<sub>2</sub> separation, we used the Ideal Adsorbed Solution Theory (IAST) of Myers and Prausnitz along with the pure component isotherm fits to determine the molar loadings in the mixture for specified partial pressures in the bulk gas phase.

The pure component isotherms of CO<sub>2</sub> measured at 273 K were fitted with the dual-site Langmuir (DSL) model:

$$q = q_A + q_B = q_{\text{sat,A}} \frac{b_A p}{1 + b_A p} + q_{\text{sat,B}} \frac{b_B p}{1 + b_B p}$$

The pure component isotherms of N<sub>2</sub> measured at 273 K were fitted with the single-site Langmuir (SSL) model:

$$q = q_{\text{sat,A}} \frac{b_A p}{1 + b_A p}$$

where,  $q$  is molar loading of adsorbate (mmol g<sup>-1</sup>),  $q_{\text{sat}}$  is saturation loading (mmol g<sup>-1</sup>),  $b$  is parameter in the pure component Langmuir isotherm (bar<sup>-1</sup>),  $p$  is bulk gas phase pressure (bar).

Pure-component isotherm fitting parameters were then used for calculating IAST binary-gas adsorption selectivities ( $S_{\text{ads}}$ ).  $S_{\text{ads}}$  is defined as:

$$S_{\text{ads}} = \frac{q_1/q_2}{p_1/p_2}$$

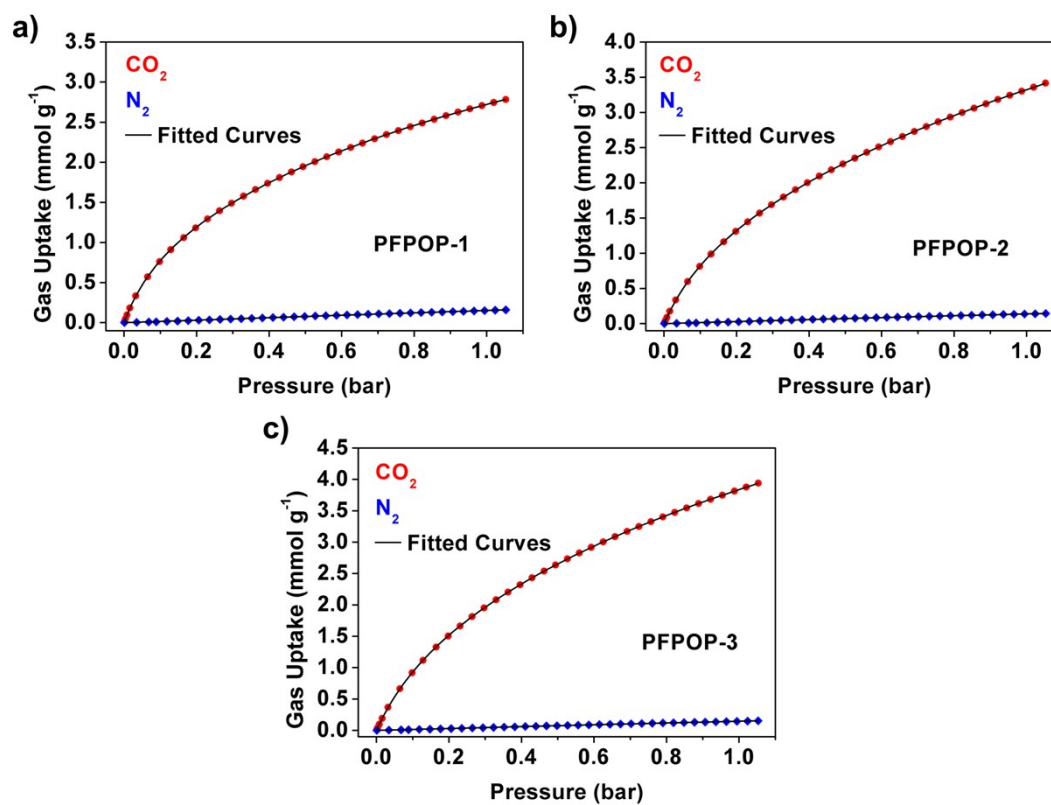

**Fig. S5** The corresponding isotherm fits (solid black lines) dual-site Langmuir model fits for CO<sub>2</sub> and single-site Langmuir model for N<sub>2</sub> of **PFPOP-1** (a), **PFPOP-2** (b), and **PFPOP-3** (c) based on experimental pure component isotherms for CO<sub>2</sub> (red) and N<sub>2</sub> (blue) at 273 K.



**Table S2** Langmuir fitting parameters of CO<sub>2</sub> and N<sub>2</sub> adsorption isotherms of **PFPOP-1–3** at 273 K.

| PFPOPs  | Gas             | $q_{\text{sat,A}}$<br>(mmol g <sup>-1</sup> ) | $b_{\text{A}}$<br>(bar <sup>-1</sup> ) | $q_{\text{sat,B}}$<br>(mmol g <sup>-1</sup> ) | $b_{\text{B}}$<br>(bar <sup>-1</sup> ) |
|---------|-----------------|-----------------------------------------------|----------------------------------------|-----------------------------------------------|----------------------------------------|
| PFPOP-1 | CO <sub>2</sub> | 4.78740                                       | 0.55962                                | 1.11936                                       | 8.68132                                |
|         | N <sub>2</sub>  | 6.12831                                       | 0.02553                                |                                               |                                        |
| PFPOP-2 | CO <sub>2</sub> | 8.12292                                       | 0.34526                                | 1.43774                                       | 6.22190                                |
|         | N <sub>2</sub>  | 1.62911                                       | 0.09268                                |                                               |                                        |
| PFPOP-3 | CO <sub>2</sub> | 7.99534                                       | 0.44457                                | 1.61727                                       | 5.72241                                |
|         | N <sub>2</sub>  | 3.14180                                       | 0.04877                                |                                               |                                        |
